# Supplementary material
Source: PubMed Central journal article supplement (PMC9041471)
Supplement: Suppl_FigS1.pdf [file Suppl_FigS1.pdf]

## Supplementary Data

F8 phage

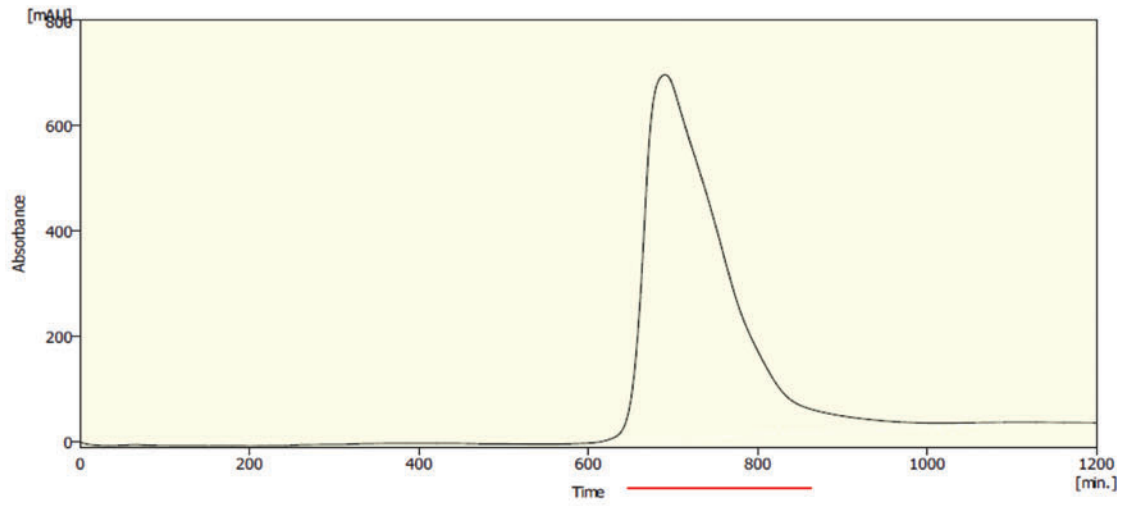

LMA2 phage

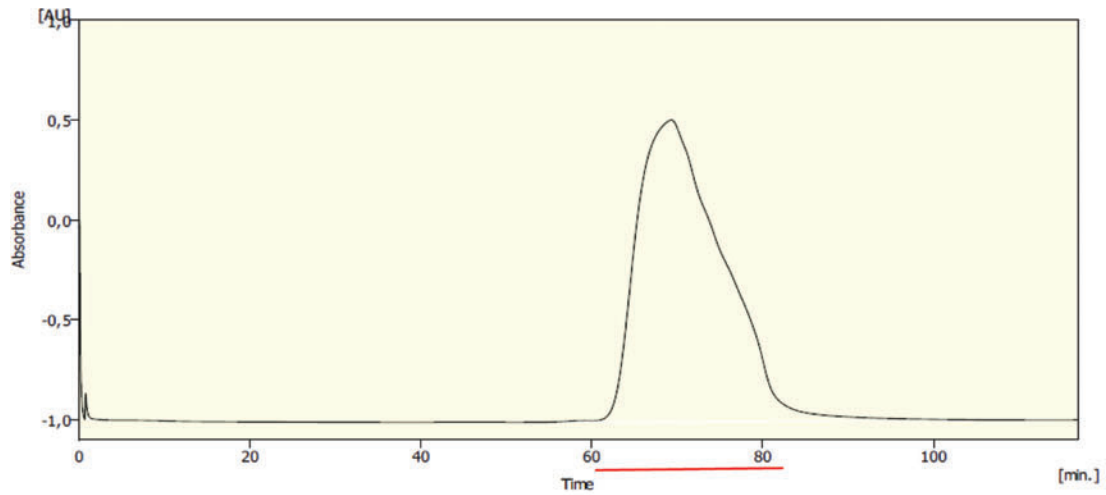

DP1 phage

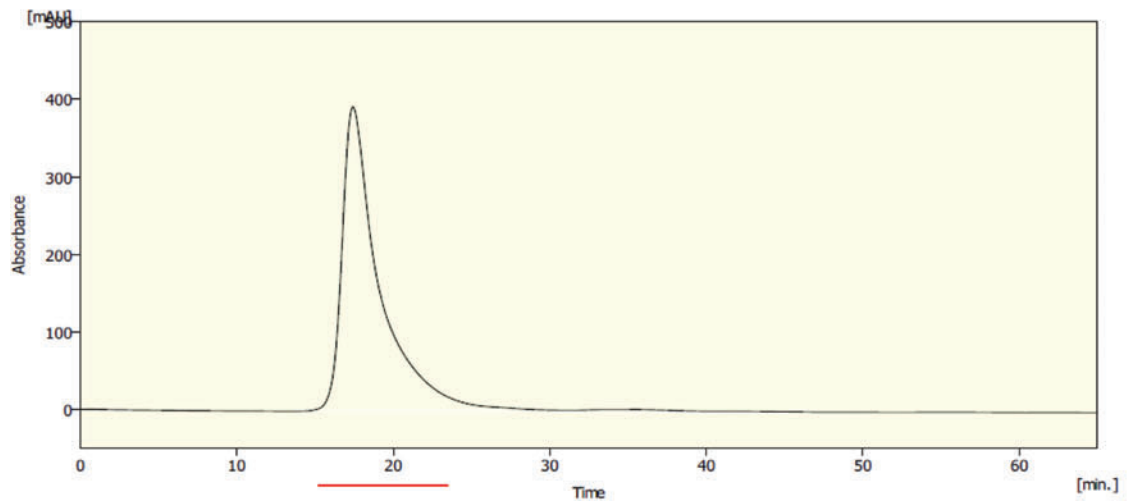

— phage fraction

**SUPPLEMENTARY FIG. S1.** Chromatograms for phages F8, LMA2, DP1. Size exclusion chromatography on Sepharose 4B resin (Sigma).
