# Supplementary material
Source: PubMed Central journal article supplement (PMC9041471)
Supplement: Suppl_FigS2.pdf [file Suppl_FigS2.pdf]

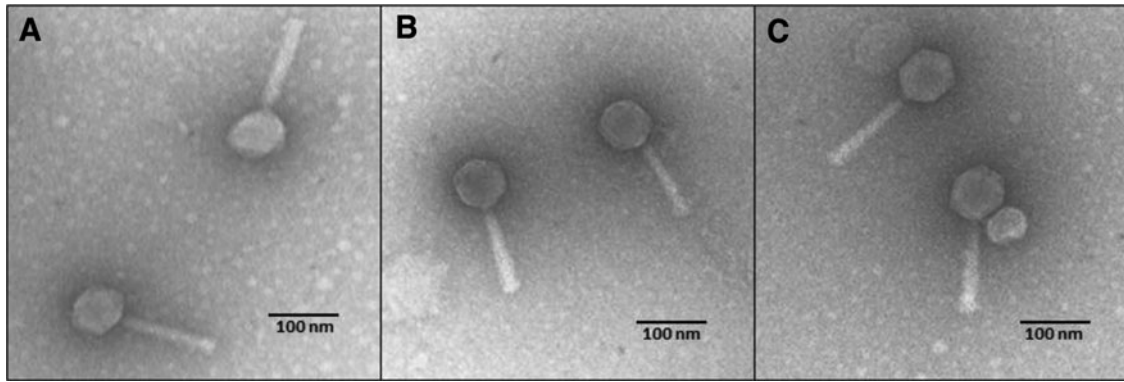

**SUPPLEMENTARY FIG. S2.** Bacteriophages F8 (A), DP1 (B) and LMA2 (C), TEM imaging. TEM, transmission electron microscopy.
