# Supplementary material
Source: PubMed Central journal article supplement (PMC9041471)
Supplement: Suppl_FigS3.pdf [file Suppl_FigS3.pdf]

|                                               | Example 1                                                                           | Example 2                                                                            | Localization |
|-----------------------------------------------|-------------------------------------------------------------------------------------|--------------------------------------------------------------------------------------|--------------|
| DP1 phage                                     | 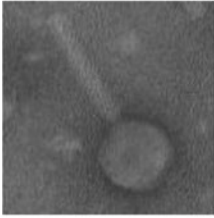   |    | control      |
| DP1 phage treated with control serum          |    |    | control      |
| DP1 phage treated with serum specific to gp22 |   |   | head         |
| DP1 phage treated with serum specific to gp29 |  |  | tail         |

**SUPPLEMENTARY FIG. S3.** Localization of proteins gp22, and gp29 in DP1 phage virions, exemplary TEM images. Proteins were visualized by binding to by gold nanoparticles (5 nm).
