# Supplementary material
Source: PubMed Central journal article supplement (PMC9041471)
Supplement: Suppl_FigS4-S5.pdf [file Suppl_FigS4-S5.pdf]

1 10 20 30 40 50 60 70 80 90 100  
 Consensus Identity  
 1. LMA2  
 2. DP1  
 3. F8  
 110 120 130 140 150 160 170 180 190 200  
 Consensus Identity  
 1. LMA2  
 2. DP1  
 3. F8  
 210 220 230 240 250 260 270 280 290 300  
 Consensus Identity  
 1. LMA2  
 2. DP1  
 3. F8  
 310 320 330 340 350 360 370 380 390 400  
 Consensus Identity  
 1. LMA2  
 2. DP1  
 3. F8  
 410 420 430 440 450 460 470 480 490 500 504  
 Consensus Identity  
 1. LMA2  
 2. DP1  
 3. F8

SUPPLEMENTARY FIG. S4. Comparison of gp29 sequences in bacteriophages F8, LMA2, and DP1.

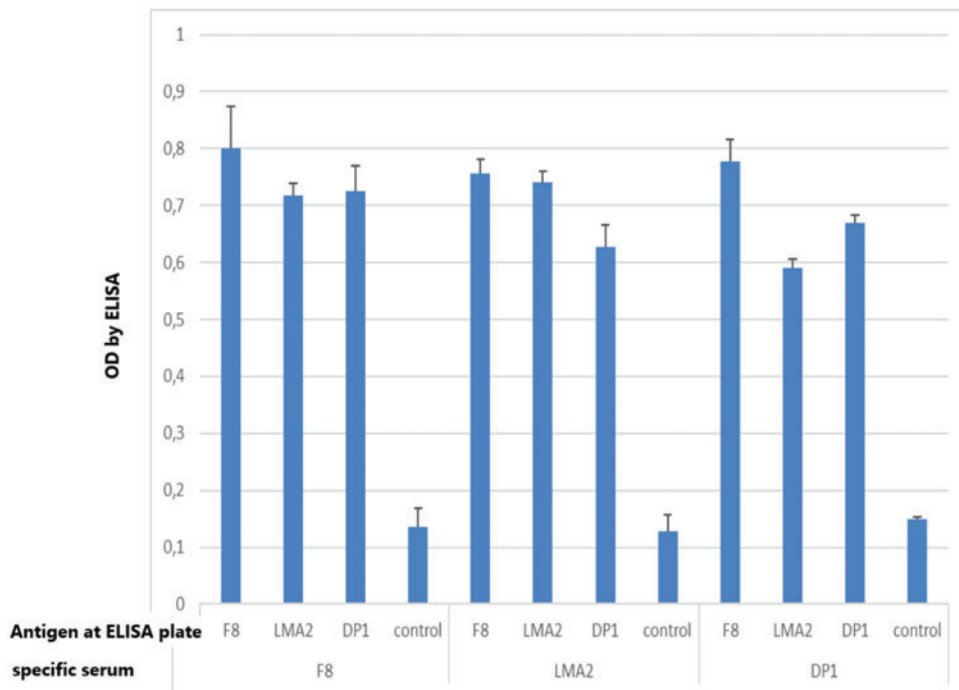

SUPPLEMENTARY FIG. S5. Cross-reactions between F8-, LMA2-, and DP1-specific reference sera as revealed by ELISA. Antigen at ELISA plate-phage that covered plates for testing ( $5 \times 10^8$  pfu per well, overnight), specific serum-reference murine serum obtained by three challenges (days 0, 21, and 45) with  $5 \times 10^8$  pfu per mouse (with adjuvant), separated by blood clotting, control-albumin-covered wells. ELISA, enzyme-linked immunosorbent assay.
