# Supplementary material
Source: PubMed Central journal article supplement (PMC9041471)
Supplement: Suppl_TableS1-S2.pdf [file Suppl_TableS1-S2.pdf]

SUPPLEMENTARY TABLE S1. PHAGE TITER AND ENDOTOXIN CONTENT IN PHAGE PREPARATIONS

| Phage | Phage titer after EndoTrap and dialysis [pfu/mL] | Endotoxin content by EndoLYSE [Eu/mL] | Endotoxin content per 1010 pfu [Eu/10 exp10 pfu] |
|-------|--------------------------------------------------|---------------------------------------|--------------------------------------------------|
| F8    | 6.4 × 10 <sup>10</sup>                           | 473.57                                | 74                                               |
| LMA2  | 3.45 × 10 <sup>10</sup>                          | 567.5                                 | 167                                              |
| DP1   | 1.4 × 10 <sup>11</sup>                           | 811.13                                | 58                                               |

SUPPLEMENTARY TABLE S2. ANALYSIS OF THE COMPATIBILITY BETWEEN THE RESPONSE OF SERA OF 55 HEALTHY DONORS WITH PHAGE F8, LMA2, AND DP1

| Serum sample no | Sex and age | Phage |      |     |            |
|-----------------|-------------|-------|------|-----|------------|
|                 |             | F8    | LMA2 | DP1 | Compliance |
| 1               | F, 24       | -     | -    | -   | Y          |
| 2               | F, 27       | +     | +    | +   | Y          |
| 3               | F, 27       | -     | -    | +   | N          |
| 4               | M, 25       | -     | -    | +   | N          |
| 5               | M, 24       | -     | -    | -   | Y          |
| 6               | F, 27       | -     | -    | -   | Y          |
| 7               | M, 27       | -     | -    | -   | Y          |
| 8               | M, 25       | -     | -    | +   | N          |
| 9               | M, 24       | -     | -    | +   | N          |
| 10              | M, 31       | +     | -    | +   | N          |
| 11              | M, 28       | -     | +    | +   | N          |
| 12              | M, 25       | -     | -    | +   | N          |
| 13              | F, 29       | -     | -    | +   | N          |
| 14              | F, 22       | +     | -    | +   | N          |
| 15              | M, 25       | -     | -    | -   | Y          |
| 16              | M, 27       | +     | -    | +   | N          |
| 17              | F, 25       | -     | -    | +   | N          |
| 18              | M, 33       | -     | -    | -   | Y          |
| 19              | M, 24       | -     | +    | -   | N          |
| 20              | F, 25       | -     | -    | -   | Y          |
| 21              | F, 21       | -     | -    | +   | N          |
| 22              | F, 22       | -     | -    | -   | Y          |
| 23              | M, 32       | -     | -    | -   | Y          |
| 24              | F, 21       | -     | -    | +   | N          |
| 25              | M, 20       | +     | +    | -   | N          |
| 26              | M, 19       | +     | -    | +   | N          |
| 27              | M, 19       | -     | -    | -   | Y          |
| 28              | F, 21       | -     | -    | -   | Y          |
| 29              | M, 19       | -     | -    | -   | Y          |
| 30              | M, 19       | -     | -    | +   | N          |
| 31              | M, 20       | -     | -    | -   | Y          |
| 32              | F, 19       | -     | -    | -   | Y          |
| 33              | F, 20       | -     | -    | -   | Y          |
| 34              | M, 19       | -     | -    | -   | Y          |
| 35              | M, 21       | -     | -    | -   | Y          |
| 36              | F, 20       | -     | -    | -   | Y          |
| 37              | F, 20       | -     | -    | -   | Y          |
| 38              | F, 21       | -     | -    | -   | Y          |
| 39              | F, 20       | -     | -    | -   | Y          |
| 40              | F, 21       | -     | -    | -   | Y          |
| 41              | M, 21       | -     | -    | +   | N          |
| 42              | M, 19       | -     | -    | -   | Y          |
| 43              | M, 21       | -     | -    | -   | Y          |
| 44              | F, 20       | -     | -    | -   | Y          |
| 45              | F, 18       | +     | -    | +   | N          |
| 46              | M, 19       | +     | +    | +   | Y          |
| 47              | M, 19       | -     | -    | -   | Y          |
| 48              | M, 19       | -     | -    | +   | N          |
| 49              | F, 20       | -     | -    | -   | Y          |
| 50              | F, 20       | -     | -    | -   | Y          |
| 51              | M, 21       | -     | -    | -   | Y          |
| 52              | M, 20       | -     | +    | -   | N          |
| 53              | F, 19       | -     | -    | +   | N          |
| 54              | M, 19       | -     | -    | +   | N          |
| 55              | F, 19       | -     | -    | -   | Y          |

F, female; M, male; N, lack of compliance; Y, compliance.
