# Supplementary material
Source: PubMed Central journal article supplement (PMC9041471)
Supplement: Suppl_TableS3.pdf [file Suppl_TableS3.pdf]

SUPPLEMENTARY TABLE S3. CHARACTERISTICS OF PATIENTS TREATED WITH F8 PHAGE AND INVESTIGATED FOR PHAGE PROTEIN-SPECIFIC ANTIBODIES

| Sample no | Sex, adm. route | Type of infection                                                                                                                                                                                                          | Structural protein-specific antibodies                                                |                                                                                       |
|-----------|-----------------|----------------------------------------------------------------------------------------------------------------------------------------------------------------------------------------------------------------------------|---------------------------------------------------------------------------------------|---------------------------------------------------------------------------------------|
|           |                 |                                                                                                                                                                                                                            | anti-gp22                                                                             | anti-gp29                                                                             |
| 1         | F, O+T          | Status after removal of squamous cell carcinoma of the retromolar triangle, palatoglossal arch, and root of the tongue. Postoperative wound with a fistula draining to the bottom of the mouth in the submandibular region | 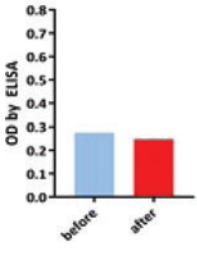   |    |
| 2         | F, O+T          | Recurrent lower respiratory tract infections and chronic sinusitis                                                                                                                                                         |    |    |
| 3         | M, T            | Diabetic foot syndrome. Deep sores of both feet                                                                                                                                                                            |   |   |
| 4         | F, O+T          | Bronchial asthma. Sinusitis. Chronic bronchitis                                                                                                                                                                            |  |  |
| 5         | F, O+T          | Recurrent bilateral otitis externa                                                                                                                                                                                         |  |  |
| 6         | M, O            | Chronic otitis media                                                                                                                                                                                                       |  |  |

(continued)

SUPPLEMENTARY TABLE S3. (CONTINUED)

| Sample no | Sex, adm. route | Type of infection                                                                                                                                                    | Structural protein-specific antibodies                                                |                                                                                       |
|-----------|-----------------|----------------------------------------------------------------------------------------------------------------------------------------------------------------------|---------------------------------------------------------------------------------------|---------------------------------------------------------------------------------------|
|           |                 |                                                                                                                                                                      | anti-gp22                                                                             | anti-gp29                                                                             |
| 7         | M, O            | Chronic bronchitis, chronic lymphocytic leukemia                                                                                                                     | 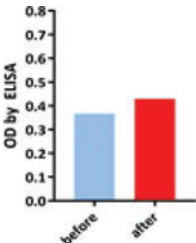   |    |
| 8         | F, O            | Bronchiectasis, chronic obstructive pulmonary disease                                                                                                                |    |    |
| 9         | M, T            | Infection of the chest infection after removal of the upper lobe of the right lung and a thoracostomy formation. Infection of the ribs and sternum. Immunodeficiency |   |   |
| 10        | M, O            | Purulent fistula after brain tumor removal surgery                                                                                                                   |  |  |
| 11        | F, O            | Chronic sinusitis                                                                                                                                                    |  |  |

after, serum sample collected after at least 1 week of phage treatment; before, serum sample collected before therapy; F, female; M, male; O, oral; T, topical.
